# Supplementary material
Source: MDPI journal article supplement (https://www.mdpi.com/2073-4395/13/8/1956)
Supplement: s1 [file s1]

## Supplementary Materials

### Nutrient Balance in Hass Avocado Trees as a Tool to Optimize Crop Fertilization Management

Table S1. Database of mineral concentration in leaves

| Tree Number | Sampling Date | Sample code | Orchard | N    | P    | S    | K    | Mg   | Ca   | B     | Fe     | Mn     | Cu    | Zn    | Yield kg/tree |
|-------------|---------------|-------------|---------|------|------|------|------|------|------|-------|--------|--------|-------|-------|---------------|
| 1           | 08/06/2022    | F22-17086   | ET      | 2,40 | 0,14 | 0,25 | 1,00 | 0,39 | 1,73 | 23,40 | 92,10  | 62,10  | 7,31  | 32,94 | 118,90        |
| 2           |               | F22-17087   |         | 2,19 | 0,13 | 0,21 | 0,92 | 0,35 | 1,50 | 20,80 | 85,76  | 52,90  | 6,42  | 26,13 | 84,50         |
| 3           |               | F22-17088   |         | 2,21 | 0,16 | 0,23 | 0,94 | 0,42 | 1,59 | 10,39 | 77,27  | 34,47  | 5,41  | 23,39 | 86,90         |
| 4           |               | F22-17089   |         | 2,47 | 0,15 | 0,21 | 1,25 | 0,37 | 1,57 | 20,80 | 78,89  | 60,72  | 6,42  | 27,20 | 119,20        |
| 5           |               | F22-17090   |         | 2,70 | 0,17 | 0,28 | 1,16 | 0,45 | 1,47 | 26,03 | 81,77  | 94,72  | 8,14  | 32,03 | 115,30        |
| 6           |               | F22-17091   |         | 2,58 | 0,15 | 0,23 | 1,16 | 0,31 | 1,35 | 25,55 | 93,98  | 111,66 | 7,19  | 24,34 | 95,80         |
| 7           |               | F22-17092   |         | 2,89 | 0,16 | 0,29 | 1,13 | 0,41 | 1,63 | 25,89 | 91,31  | 62,36  | 7,42  | 31,03 | 175,90        |
| 8           |               | F22-17093   |         | 2,12 | 0,13 | 0,17 | 1,28 | 0,28 | 1,05 | 14,82 | 62,88  | 37,01  | 4,80  | 22,17 | 88,90         |
| 9           |               | F22-17094   |         | 2,18 | 0,15 | 0,22 | 1,22 | 0,30 | 1,08 | 18,26 | 86,28  | 66,63  | 5,75  | 32,15 | 93,80         |
| 10          |               | F22-17095   |         | 2,90 | 0,15 | 0,23 | 1,24 | 0,36 | 1,49 | 22,50 | 84,23  | 87,66  | 7,16  | 28,04 | 178,50        |
| 11          |               | F22-17096   |         | 2,47 | 0,17 | 0,24 | 1,21 | 0,37 | 1,47 | 24,04 | 77,41  | 59,38  | 6,87  | 27,45 | 92,60         |
| 12          |               | F22-17097   |         | 2,52 | 0,13 | 0,18 | 1,00 | 0,32 | 1,21 | 15,05 | 80,24  | 94,65  | 6,93  | 25,48 | 92,90         |
| 13          |               | F22-17098   |         | 2,60 | 0,18 | 0,23 | 1,22 | 0,41 | 1,47 | 23,21 | 73,03  | 62,12  | 6,83  | 26,02 | 158,70        |
| 14          |               | F22-17099   |         | 2,56 | 0,14 | 0,20 | 1,02 | 0,40 | 1,63 | 20,45 | 72,11  | 66,36  | 5,55  | 26,17 | 89,10         |
| 15          |               | F22-17100   |         | 2,44 | 0,16 | 0,22 | 1,05 | 0,40 | 1,57 | 19,75 | 71,81  | 46,15  | 5,65  | 27,93 | 113,80        |
| 16          |               | F22-17101   |         | 2,66 | 0,17 | 0,26 | 1,20 | 0,44 | 1,75 | 22,57 | 92,66  | 107,59 | 6,92  | 29,25 | 111,12        |
| 17          |               | F22-17102   |         | 1,87 | 0,13 | 0,19 | 1,15 | 0,35 | 1,34 | 14,12 | 73,69  | 34,56  | 6,70  | 24,03 | 90,50         |
| 18          |               | F22-17103   |         | 2,52 | 0,14 | 0,21 | 0,90 | 0,38 | 1,48 | 16,59 | 88,16  | 48,74  | 6,00  | 23,34 | 81,85         |
| 19          |               | F22-17104   |         | 2,67 | 0,14 | 0,20 | 1,17 | 0,33 | 0,95 | 16,37 | 87,41  | 132,77 | 6,34  | 27,56 | 87,80         |
| 20          |               | F22-17105   |         | 2,38 | 0,13 | 0,19 | 1,01 | 0,36 | 1,49 | 19,87 | 68,89  | 80,69  | 5,43  | 23,89 | 127,20        |
| 21          | 10/06/2022    | F22-17046   | M       | 2,32 | 0,16 | 0,21 | 1,46 | 0,34 | 1,51 | 26,63 | 60,42  | 105,14 | 7,34  | 30,42 | 112,30        |
| 22          |               | F22-17047   |         | 2,33 | 0,15 | 0,21 | 1,21 | 0,26 | 1,62 | 18,67 | 57,10  | 134,19 | 9,93  | 30,93 | 80,60         |
| 23          |               | F22-17048   |         | 2,02 | 0,11 | 0,17 | 1,24 | 0,28 | 1,48 | 17,53 | 101,87 | 117,10 | 8,25  | 29,90 | 96,10         |
| 24          |               | F22-17049   |         | 2,11 | 0,11 | 0,13 | 0,96 | 0,27 | 1,37 | 18,19 | 43,17  | 89,06  | 6,51  | 18,92 | 83,56         |
| 25          |               | F22-17050   |         | 2,16 | 0,15 | 0,24 | 1,18 | 0,26 | 1,33 | 16,20 | 49,68  | 82,16  | 9,32  | 35,10 | 127,70        |
| 26          |               | F22-17051   |         | 2,36 | 0,15 | 0,23 | 1,33 | 0,26 | 1,47 | 17,26 | 44,11  | 156,93 | 8,69  | 32,83 | 93,50         |
| 27          |               | F22-17052   |         | 2,33 | 0,14 | 0,19 | 1,04 | 0,24 | 0,97 | 17,87 | 105,91 | 139,75 | 9,10  | 28,14 | 160,40        |
| 28          |               | F22-17053   |         | 2,00 | 0,13 | 0,18 | 0,99 | 0,21 | 1,23 | 15,96 | 44,12  | 105,24 | 8,33  | 33,11 | 160,40        |
| 29          |               | F22-17054   |         | 2,21 | 0,14 | 0,21 | 1,18 | 0,25 | 1,22 | 22,72 | 43,72  | 112,67 | 8,08  | 28,91 | 98,96         |
| 30          |               | F22-17055   |         | 2,24 | 0,15 | 0,21 | 1,28 | 0,26 | 1,00 | 13,11 | 48,46  | 115,04 | 6,65  | 18,59 | 131,40        |
| 31          |               | F22-17056   |         | 2,15 | 0,14 | 0,19 | 1,05 | 0,28 | 1,31 | 16,02 | 44,53  | 112,12 | 7,75  | 32,28 | 130,80        |
| 32          |               | F22-17057   |         | 2,35 | 0,13 | 0,20 | 1,03 | 0,24 | 1,26 | 13,92 | 62,21  | 177,54 | 7,97  | 37,82 | 147,70        |
| 33          |               | F22-17058   |         | 2,30 | 0,15 | 0,28 | 0,92 | 0,26 | 1,23 | 15,26 | 66,05  | 218,70 | 7,20  | 32,77 | 112,36        |
| 34          |               | F22-17059   |         | 2,64 | 0,16 | 0,23 | 1,13 | 0,33 | 1,47 | 26,28 | 52,72  | 134,24 | 10,54 | 51,11 | 87,60         |
| 35          |               | F22-17060   |         | 2,30 | 0,13 | 0,21 | 0,72 | 0,22 | 1,37 | 11,26 | 56,86  | 213,17 | 6,69  | 31,08 | 127,70        |
| 36          |               | F22-17061   |         | 2,37 | 0,14 | 0,21 | 1,16 | 0,28 | 1,21 | 19,76 | 64,03  | 131,20 | 10,60 | 46,89 | 101,00        |
| 37          |               | F22-17062   |         | 2,78 | 0,21 | 0,31 | 0,96 | 0,37 | 1,66 | 13,58 | 84,51  | 263,88 | 9,76  | 38,86 | 119,50        |
| 38          |               | F22-17063   |         | 2,18 | 0,12 | 0,18 | 0,90 | 0,18 | 0,96 | 10,01 | 58,19  | 364,04 | 9,57  | 33,53 | 133,40        |
| 39          |               | F22-17064   |         | 2,27 | 0,13 | 0,17 | 0,85 | 0,23 | 0,95 | 16,91 | 52,27  | 226,61 | 8,39  | 24,78 | 111,70        |
| 40          |               | F22-17065   |         | 2,28 | 0,14 | 0,19 | 0,86 | 0,23 | 1,03 | 19,96 | 54,26  | 268,84 | 10,60 | 45,26 | 115,60        |

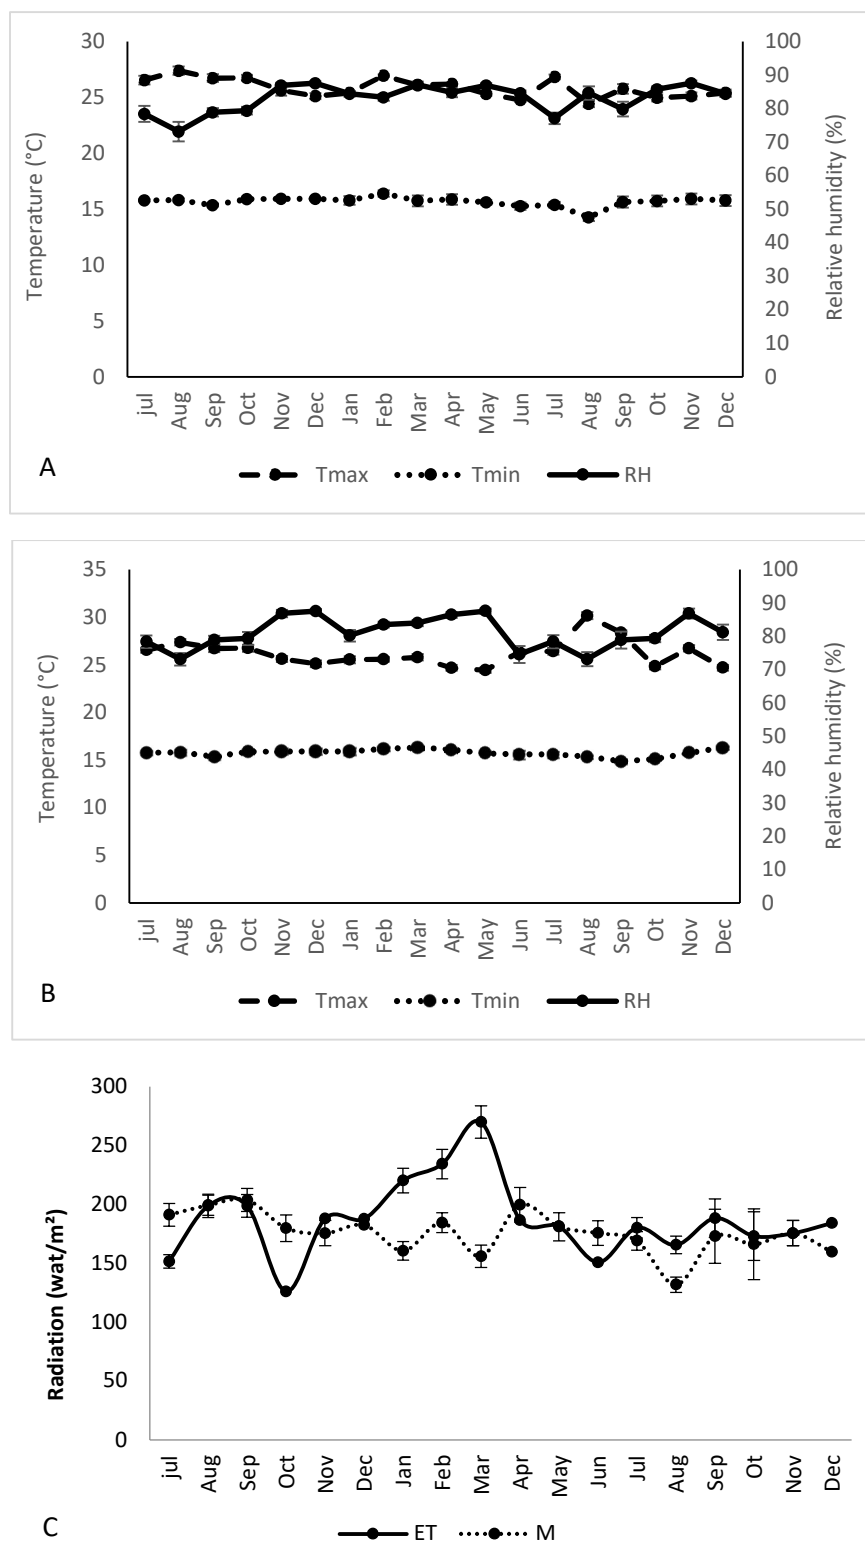

**Figure S1.** Climatic variables for Hass avocado experimental orchards in the Cauca region. (A) Maximum and minimum temperature and relative humidity for the M orchard. (B) Maximum and minimum temperature and relative humidity for the ET orchard. (C) Radiation for ET and M orchards.
